# Supplementary material for: Ebola virus infection induces autoimmunity against dsDNA and HSP60
Source: PubMed Central journal article supplement (PMC5299614; doi:10.1038/srep42147), 2017-02-09
Supplement: srep42147-s1.pdf [file srep42147-s1.pdf]

1 **Ebola virus infection induces autoimmunity against dsDNA and HSP60**

H. Fausther-Bovendo<sup>1,2</sup>, X. Qiu<sup>1,2</sup>, S McCorrister<sup>3</sup>, G. Westmacott<sup>3</sup>, P. Sandstrom<sup>3,4</sup>, C. Castilletti<sup>5</sup>,  
A. Di Caro<sup>5</sup>, G. Ippolito<sup>5</sup>, G. P. Kobinger\*<sup>2,6,7</sup>

2 **Supplemental Information**

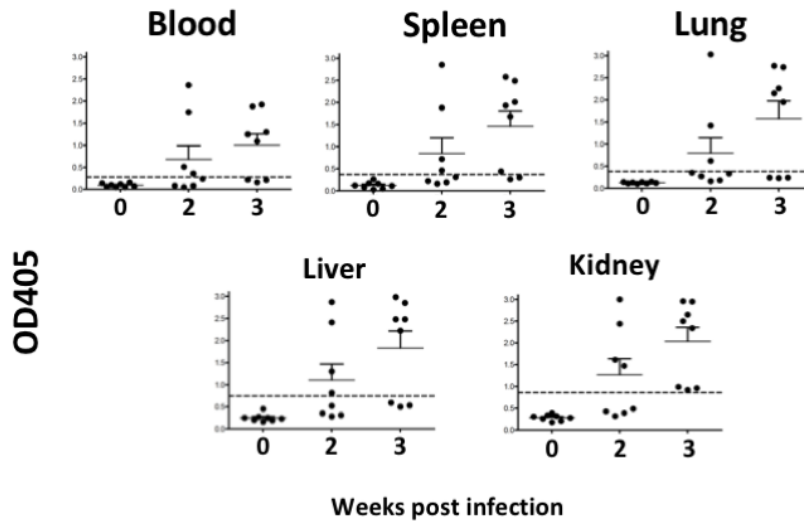

3

4

5

6 **Figure S1: Autoantibodies are detected in some MA-EBOV survivors**

7 50 fold diluted sera from naïve mice (0) and MA-EBOV infected mice 2 or 3 weeks after challenge

8 were screened from the presence of autoantibodies against various tissues by ELISA. Cumulative

9 results from 2 separate experiments are depicted (n=8 per group total). Each sample was run in

10 triplicate.

11

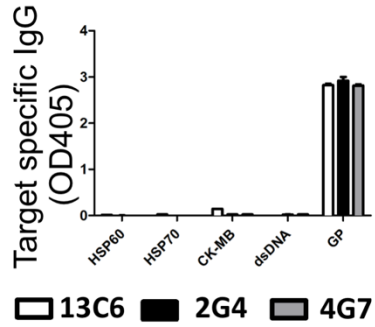

12

13 **Figure S2: The mAb within Zmapp (13C6, 2G4, 4G7) do not cross-react with the tested**  
14 **autoantigens**

15 Binding of the EBOV GP specific mAb 13C6, 2G4 and 4G7 to various autoantigens was tested by  
16 ELISA. EBOV GP was used as positive control. Each condition was run in triplicate.

**A.**

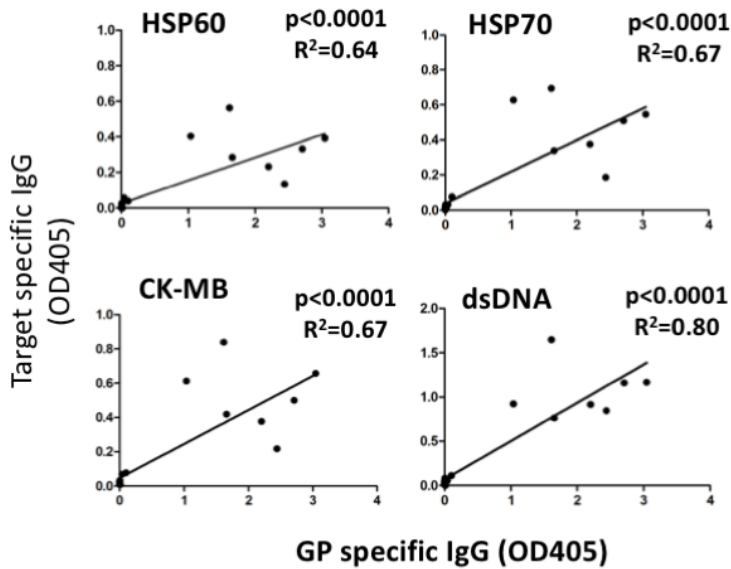

**B.**

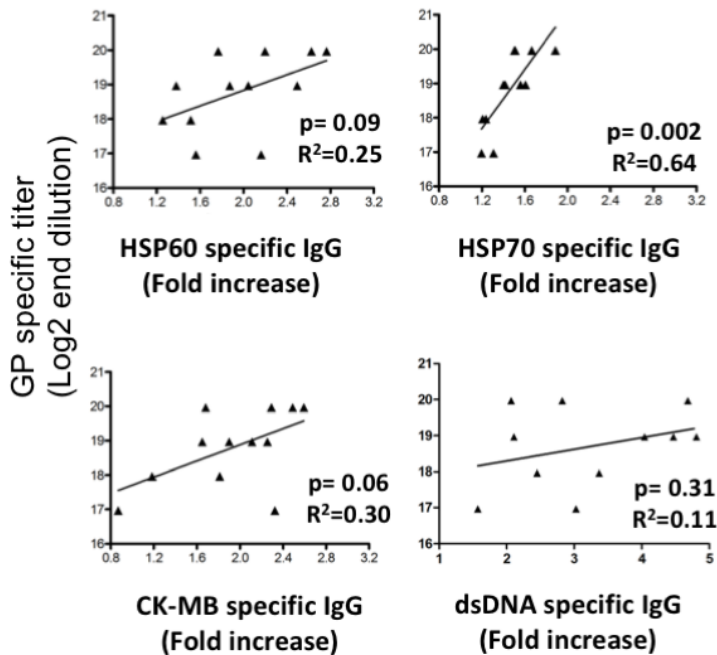

17

18 **Figure S3: Correlation between autoantibody level and GP specific antibodies.**

19 Correlation between EBOV GP and autoantibody titer were analysed in surviving mice (A.) and

20 Zmapp treated NHP (B.) following MA-EBOV and EBOV challenge. (A.) Correlation between

21 humoral response against EBOV GP (2000x dilution) and autoantibodies level in MA-EBOV

22 survivors are illustrated (n=16). (B.) Correlation between GP specific antibody titer and  
23 autoantibodies fold increase are represented. Representative data from 2 separate experiments.

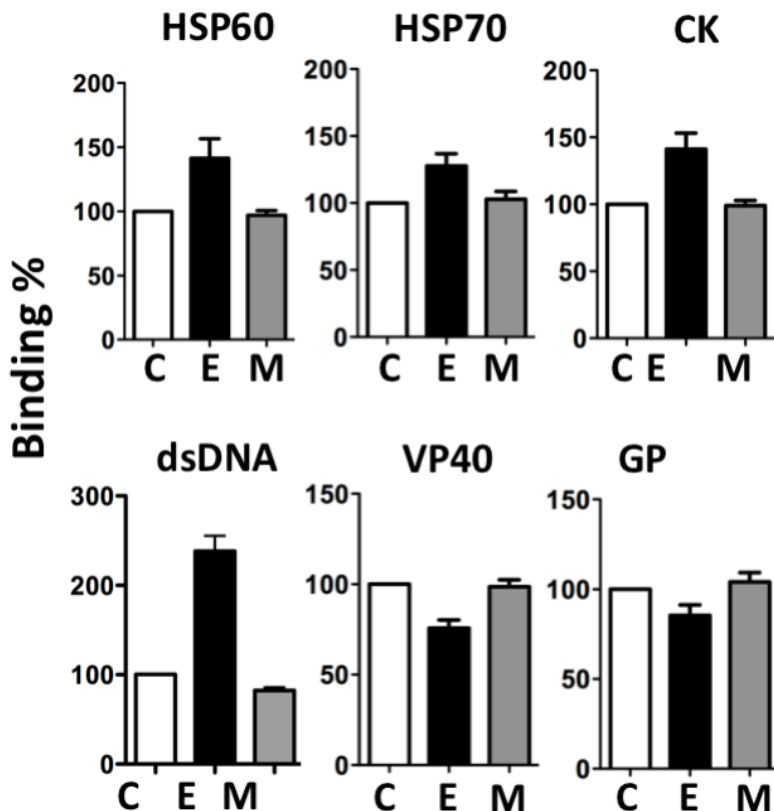

24  
25 **Figure S4: Autoantibody are not caused by antigen mimicry.**  
26 Binding to autoantigens as well as EBOV VP40 and GP was monitored in presence or absence of  
27 10-fold gamma irradiated EBOV or MARV viral particles using various dilutions of sera from  
28 MA-EBOV surviving mice. Competition ELISA were performed using 200 fold diluted sera for  
29 autoantigen as well as 800 and 4000 fold diluted sera for VP40 and GP respectively. Each sample  
30 (n=7 per group) was run in triplicate. C = control, E= EBOV, M=MARV.

31

32

33

|                    | Protein Name | accession number                                                                          | molecular weight (kDa) | Quantitative values-<br>Normalize total Spectra |            |            |            |            |
|--------------------|--------------|-------------------------------------------------------------------------------------------|------------------------|-------------------------------------------------|------------|------------|------------|------------|
|                    |              |                                                                                           |                        | Joint                                           | Muscle     | Ear        | Brain      |            |
| Target A (~60 kDa) | 1            | Serum Albumin                                                                             | ALBU_MOUSE             | 69                                              | 163        | 181        | 3330       | N.A        |
|                    | 2            | Sarcoplasmic/endoplasmic reticulum calcium ATPase 1                                       | AT2A1_MOUSE            | 109                                             | 50         | 95         | 35         | N.A        |
|                    | 3            | <b>60 kDa heat shock protein</b>                                                          | <b>CH60_MOUSE</b>      | <b>61</b>                                       | <b>54</b>  | <b>20</b>  | <b>53</b>  | <b>N.A</b> |
|                    | 4            | Stress induced phosphoprotein-1                                                           | STIP-1                 | 63                                              | 30         | 46         | 34         | N.A        |
|                    | 5            | Phosphoglucomutase                                                                        | PGM1_MOUSE             | 61                                              | 41         | 32         | 28         | N.A        |
|                    | 6            | Leukotriene A-4 hydrolase                                                                 | LKHA4_MOUSE            | 69                                              | 37         | 25         | 30         | N.A        |
|                    | 7            | very long chain specific acyl-CoA dehydrogenase                                           | ACADV_MOUSE            | 71                                              | 29         | 41         | 21         | N.A        |
|                    | 8            | Carnitine 0-acetyltransferase                                                             | CACP_MOUSE             | 71                                              | 26         | 44         | 22         | N.A        |
|                    | 9            | Pyruvate kinase PKM                                                                       | KPYM_MOUSE             | 58                                              | 29         | 39         | 24         | N.A        |
|                    | 10           | Dihydrolipoyllysine-residue acetyltransferase component of pyruvate dehydrogenase complex | ODP2_MOUSE             | 68                                              | 24         | 34         | 29         | N.A        |
| Target B (~40 kDa) | 1            | <b>Creatine kinase M-type</b>                                                             | <b>KCRM_MOUSE</b>      | <b>43</b>                                       | <b>235</b> | <b>440</b> | <b>296</b> | <b>14</b>  |
|                    | 2            | <b>Creatine kinase B-type</b>                                                             | <b>KCRB_MOUSE</b>      | <b>43</b>                                       | <b>23</b>  | <b>11</b>  | <b>46</b>  | <b>98</b>  |
|                    | 3            | Phosphoglycerate kinase 1                                                                 | PGK1_MOUSE             | 45                                              | 50         | 70         | 42         | 7          |

|    |                                            |             |    |    |    |    |    |
|----|--------------------------------------------|-------------|----|----|----|----|----|
| 4  | Succinyl-CoA ligase subunit beta           | SUCB1_MOUSE | 50 | 43 | 52 | 41 | 22 |
| 5  | Creatine kinase S type                     | KCRS_MOUSE  | 47 | 65 | 68 | 52 | 3  |
| 6  | Aspartate aminotransferase                 | AATC_MOUSE  | 46 | 25 | 34 | 30 | 31 |
| 7  | Fructose-biphosphate aldolase A            | ALDOA_MOUSE | 39 | 24 | 48 | 24 | 40 |
| 8  | Long chain specific acyl-CoA dehydrogenase | ACADL_MOUSE | 48 | 27 | 29 | 22 | 13 |
| 9  | Acetyl-CoA acetyltransferase               | THIL_MOUSE  | 45 | 20 | 22 | 20 | 27 |
| 10 | Aspartate aminotransferase                 | AATM_MOUSE  | 47 | 13 | 11 | 23 | 36 |

34

35 **Table S1: Protein identification by LC-MS/MS**

36 Proteins were identified using lysate from joint, muscle, brain as well as inner ear and temporal  
37 bone. The 10 most abundant proteins, as well as their relative level in the various lysate are  
38 illustrated. For each target, the proteins with the appropriate molecular weight and expression  
39 pattern similar to the one observed by western blot are highlighted in bold.

40

41

42

43

44

45

46

47

| Sample number | Sample Origin          | Symptoms onset (yyyy-mm-dd) | Sampling date (yyyy-mm-dd) | Time from onset (days) | GP (OD405) | HSP60 (OD405) | dsDNA (OD405) |
|---------------|------------------------|-----------------------------|----------------------------|------------------------|------------|---------------|---------------|
| DRCM 07 011   | 2007, DRC              | Unknown                     | Unknown                    | Unknown                | 0.09       | 0.37          | 0.54          |
| DRCM 07 035   | 2007, DRC              | Unknown                     | Unknown                    | Unknown                | 0.12       | 0.29          | 0.37          |
| 09 FVH 037    | 2008-2009, DRC         | 2008-12-03                  | 2009-01-24                 | 52                     | 1.29       | 0.33          | 0.39          |
| 09 FVH 038    | 2008-2009, DRC         | 2008-12-03                  | 2009-01-24                 | 52                     | 0.79       | 0.25          | 0.53          |
| 09 FVH 039    | 2008-2009, DRC         | 2008-12-23                  | 2009-01-24                 | 32                     | 0.32       | 0.47          | 0.44          |
| 09 FVH 040    | 2008-2009, DRC         | 2008-12-03                  | 2009-01-24                 | 52                     | 0.58       | 0.57          | 0.50          |
| 09 FVH 041    | 2008-2009, DRC         | 2009-01-15                  | 2009-01-22                 | 7                      | 0.15       | 0.45          | 0.34          |
| 09 FVH 044    | 2008-2009, DRC         | 2009-01-22                  | 2009-01-26                 | 4                      | 0.03       | 0.42          | 0.29          |
| 09 FVH 050    | 2008-2009, DRC         | 2008-12-25                  | 2009-01-02                 | 8                      | 0.25       | 0.69          | 0.79          |
| 09 FVH 054    | 2008-2009, DRC         | 2008-12-24                  | 2009-01-03                 | 10                     | 0.65       | 1.36          | 1.29          |
| 09 FVH 060    | 2008-2009, DRC         | Unknown                     | 2009-01-05                 | Unknown                | 0.18       | 0.45          | 0.76          |
| 09 FVH 063    | 2008-2009, DRC         | 2009-01-18                  | 2009-02-06                 | 19                     | 0.25       | 0.9345        | 0.2745        |
| Serum 6001    | 2013-2016, West Africa | 2015-02-10                  | 2016-01-13                 | 337                    | 1.27       | 0.14          | 0.17          |
| Serum 6050    | 2013-2016, West Africa | 2015-05-13                  | 2015-08-27                 | 106                    | 0.37       | 0.16          | 0.28          |
| Serum 6057    | 2013-2016, West Africa | 2014-12-16                  | 2015-11-19                 | 338                    | 1.22       | 0.10          | 0.17          |
| Serum 906     | 2013-2016, West Africa | 2014-11-24                  | 2015-02--05                | 73                     | 1.02       | 0.52          | 0.33          |

48

49 **Table S2: Characteristic of samples from confirm or suspected EBOV survivors.**

50 Serum samples from suspected EBOV survivors were obtained from 3 separate outbreaks  
51 including the most recent one in West Africa. The origin, symptoms onset and sampling date as  
52 well as antibody level against EBOV GP, HSP60 and dsDNA are indicated for each sample.

53
